# Supplementary material for: UV-resonant magnetoplasmonic properties of chemically synthesized indium nanoparticles
Source: Royal Society of Chemistry journal article supplement (doi:10.1039/d4cp00095a), 2024-01-01
Supplement: d4cp00095a1.pdf [file d4cp00095a1.pdf]

Electronic Supplementary Information (ESI) for *Phys. Chem. Chem. Phys.*

## UV-Resonant magnetoplasmonic properties of chemically synthesized indium nanoparticles

Ririka Matsuda and Hiroshi Yao\*

*Division of Chemistry for Materials, Graduate School of Engineering, Mie University, 1577 Kurimamachiya-cho, Tsu, Mie 514-8507, Japan*

**Extinction and MCD spectra displayed as a function of energy in  $\text{cm}^{-1}$  unit.**

Fig. S1 shows extinction and MCD spectra of  $\text{In}^0$  nanoparticle samples expressed as a function of energy in  $\text{cm}^{-1}$  unit.

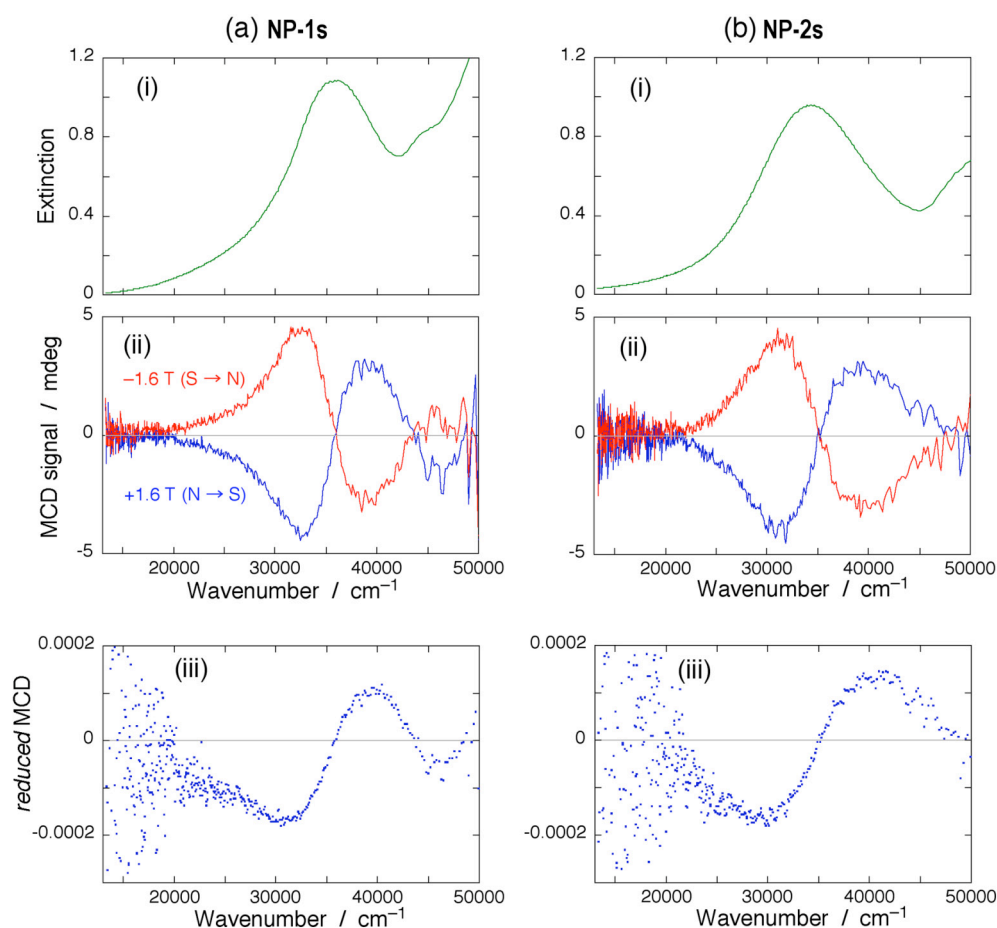

**Fig. S1.** (i) Extinction and (ii) MCD spectra of  $\text{In}^0$  nanoparticle samples (a) **NP-1s** and (b) **NP-2s**. (iii) Reduced MCD spectra of (a) **NP-1s** and (b) **NP-2s**. The spectra are expressed as a function of energy in  $\text{cm}^{-1}$ .
